# Supplementary material for: Two-dimensional Dirac TiB2C2 as a potential anode material for Li-ion batteries: a first-principles study
Source: Royal Society of Chemistry journal article supplement (doi:10.1039/d3cp02724d), 2023-01-01
Supplement: d3cp02724d1.pdf [file d3cp02724d1.pdf]

## Two-Dimensional Dirac $TiB_2C_2$ as a Potential Anode Materials for Li-Ion Batteries: A First-Principles Study

A. Etrini\*, A. Elomrani, S. Oukahou, M. Maymoun, K. Sbiaai, and A. Hasnaoui\*

Sultan Moulay Slimane University of Beni Mellal, Polydisciplinary Faculty of Khouribga, LS2ME  
Laboratory, B.P. 145, 25000 Khouribga, Morocco

Table S1: Convergence test for cutoff energy of plane wave.

| Cutoff energy (eV) (Ry) | Total energy /atom (eV/atom) | Absolute error (meV) |
|-------------------------|------------------------------|----------------------|
| 340.14259941 (25)       | -662.1342917                 | ---                  |
| 408.17111929 (30)       | -662.8512307                 | 716.939              |
| 476.19963917(35)        | -663.0572755                 | 206.0448             |
| 544.22815905 (40)       | -663.1146371                 | 57.3616              |
| 612.25667893 (45)       | -663.1303925                 | 15.7554              |
| 748.3137187 (55)        | -663.1389369                 | 8.5444               |
| 816.34223858 (60)       | -663.1414404                 | 2.5035               |
| 884.37075846 (65)       | -663.1433825                 | 1.9421               |
| 952.39927834 (70)       | -663.1448193                 | 1.4368               |
| 1020.4277982 (75)       | -663.1458342                 | 1.0149               |
| 1088.4563181 (80)       | -663.146447                  | 0.6128               |

Table S2: Convergence test for K-point mesh.

| K-point meshes [K×K×1] | Total energy /atom (eV/atom) | Absolute error (meV) |
|------------------------|------------------------------|----------------------|
| [6×6×1]                | -663.1335077                 | ---                  |
| [9×9×1]                | -663.1299739                 | 3.5338               |
| [12×12×1]              | -663.1391506                 | 9.1767               |
| [15×15×1]              | -663.1303496                 | 8.801                |
| [18×18×1]              | -663.1305766                 | 2.2706               |
| [21×21×1]              | -663.1303651                 | 2.1156               |
| [24×24×1]              | -663.1303657                 | 0.0006               |

Table S3: Adsorption energy without and with dipole correction

| Adsorption sites                 | $H_{Ti\text{-site}}$ | $T_{C\text{-site}}$ | $T_{B\text{-site}}$ |
|----------------------------------|----------------------|---------------------|---------------------|
| <b>Without Dipole correction</b> |                      |                     |                     |
| Adsorption Energy (eV)           | - 1.6320450091       | - 1.0892374216      | - 0.9292924392      |
| <b>With Dipole correction</b>    |                      |                     |                     |
| Adsorption Energy (eV)           | -1.5845681867        | - 1.0119151113      | - 0.8516292475      |

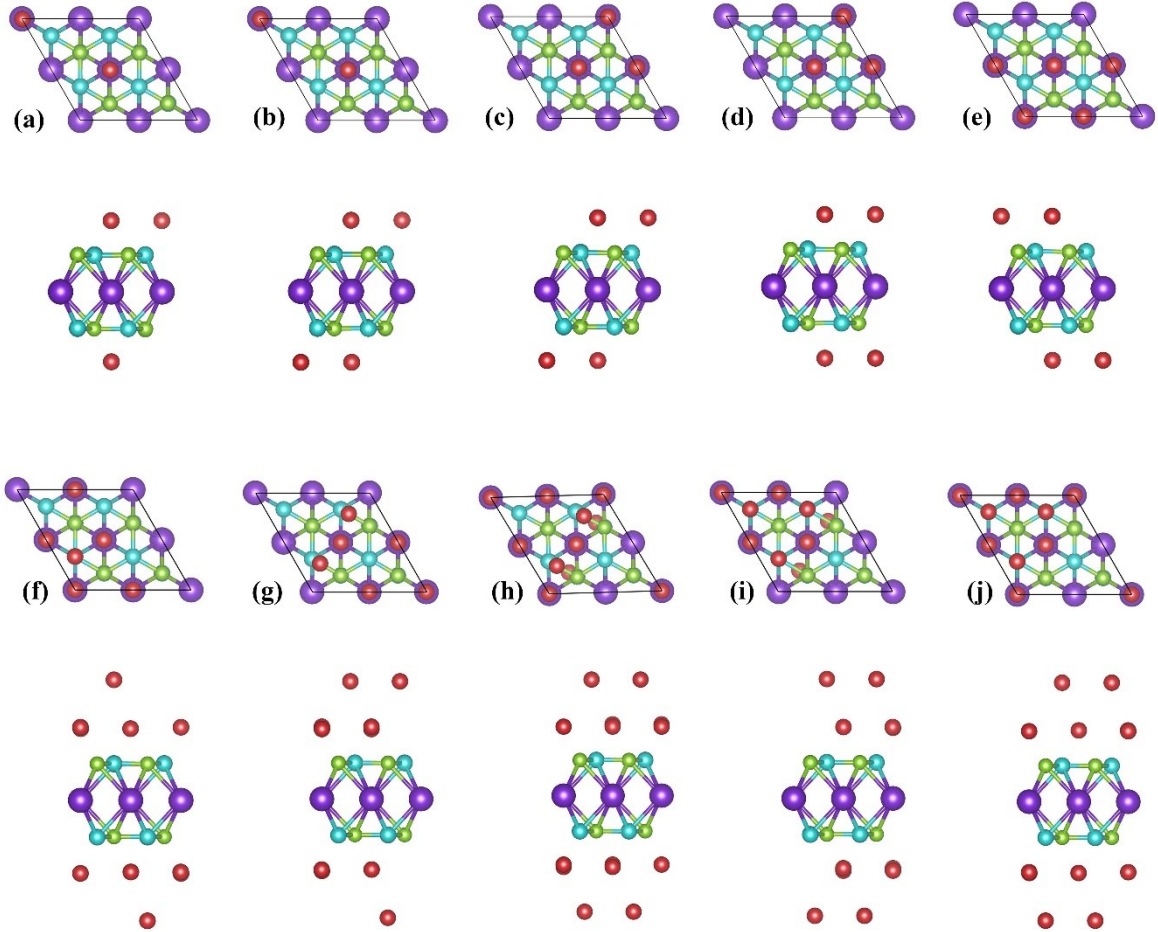

Figure S1: Top and side view of metastable structures with different Li concentrations in the  $TiB_2C_2$  monolayer. (a)  $Li_{0.75}TiB_2C_2$ ; (b)  $Li_1TiB_2C_2$ ; (c)  $Li_{1.25}TiB_2C_2$ ; (d)  $Li_{1.5}TiB_2C_2$ ; (e)  $Li_{1.75}TiB_2C_2$ ; (f)  $Li_{2.5}TiB_2C_2$ ; (g)  $Li_{2.75}TiB_2C_2$ ; (h)  $Li_3TiB_2C_2$ ; (i)  $Li_{3.25}TiB_2C_2$  and (j)  $Li_{3.5}TiB_2C_2$ .
